# Supplementary material for: The first organocopper tetrazole derivative: synthesis and characterization
Source: Royal Society of Chemistry journal article supplement (doi:10.1039/c6dt02306a), 2016-01-01
Supplement: c6dt02306a1.pdf [file c6dt02306a1.pdf]

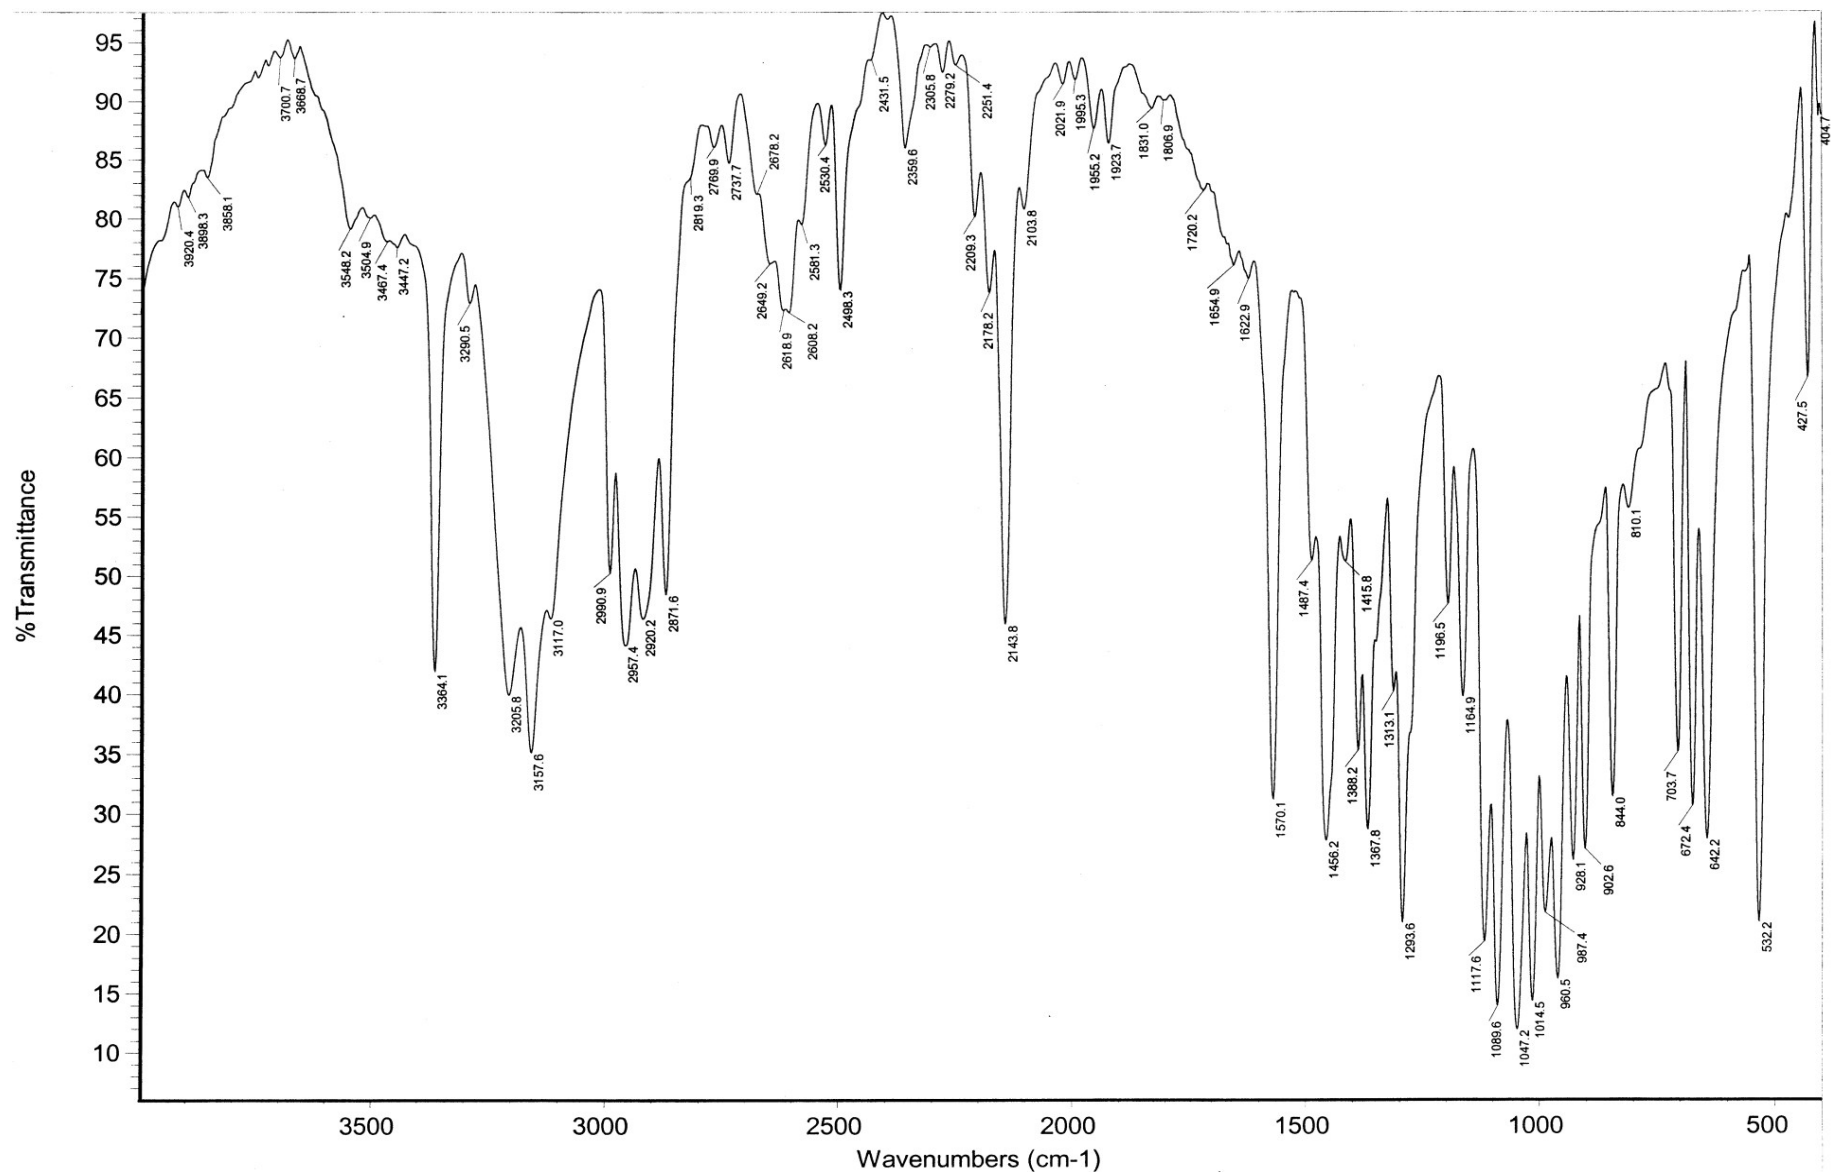

Figure S1. IR spectrum of a freshly prepared sample of complex Cu<sub>2</sub>L<sub>2</sub>Cl<sub>2</sub> (5)

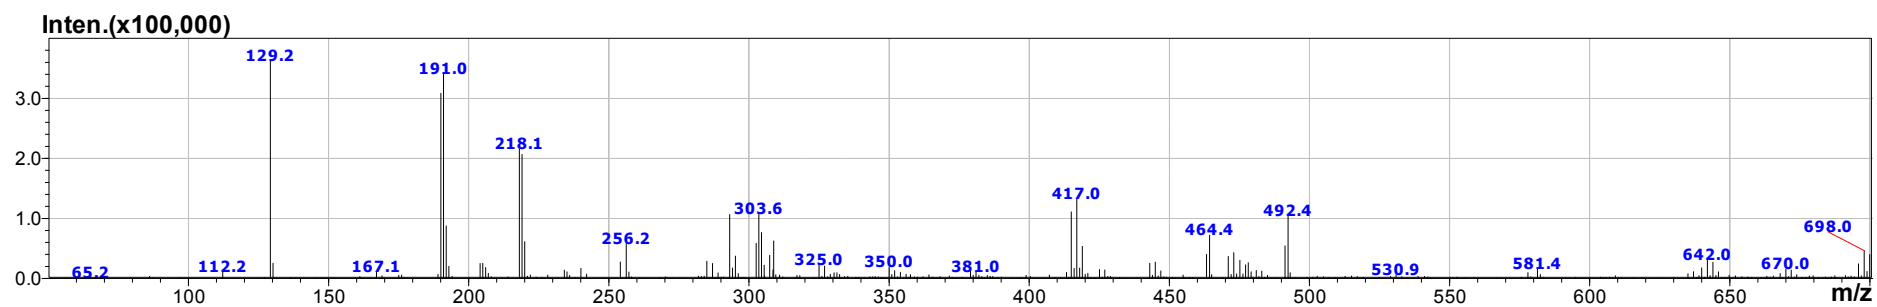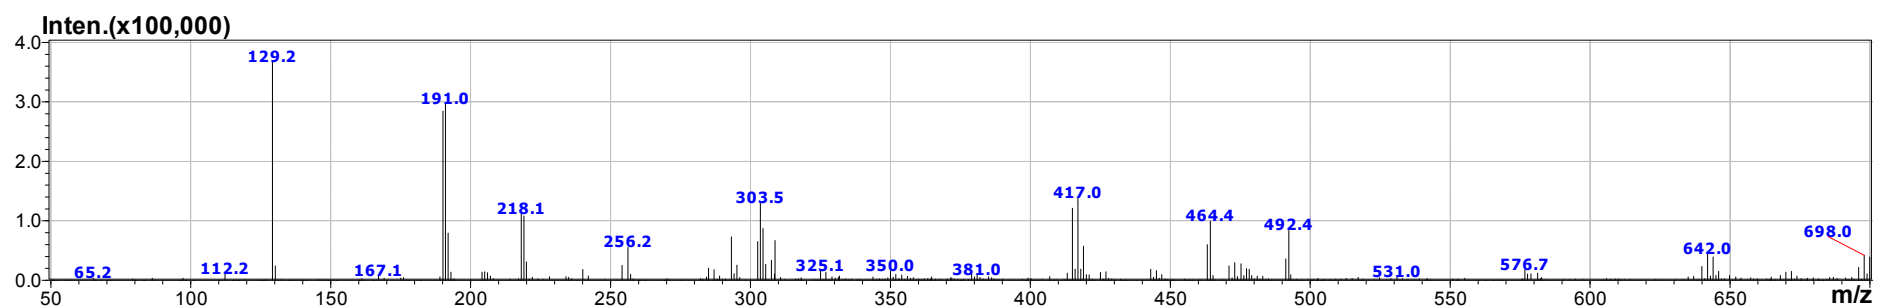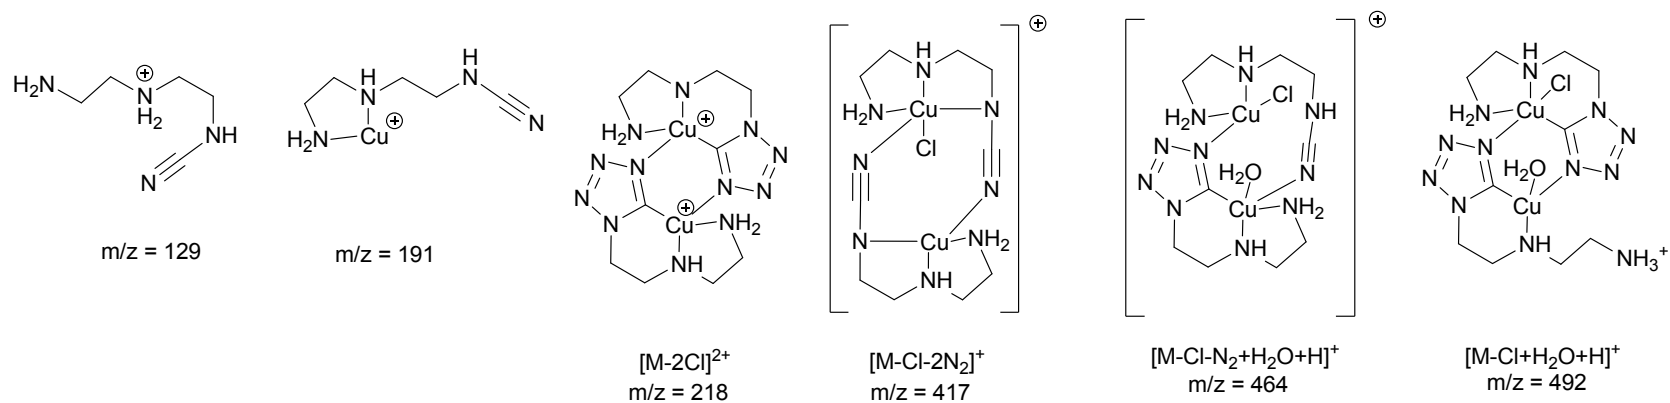

Figure S2. ESI(+)-mass spectrum of a freshly prepared sample of complex  $Cu_2L_2Cl_2$  (5) (top) and after 6 month storage at ambient conditions (bottom).

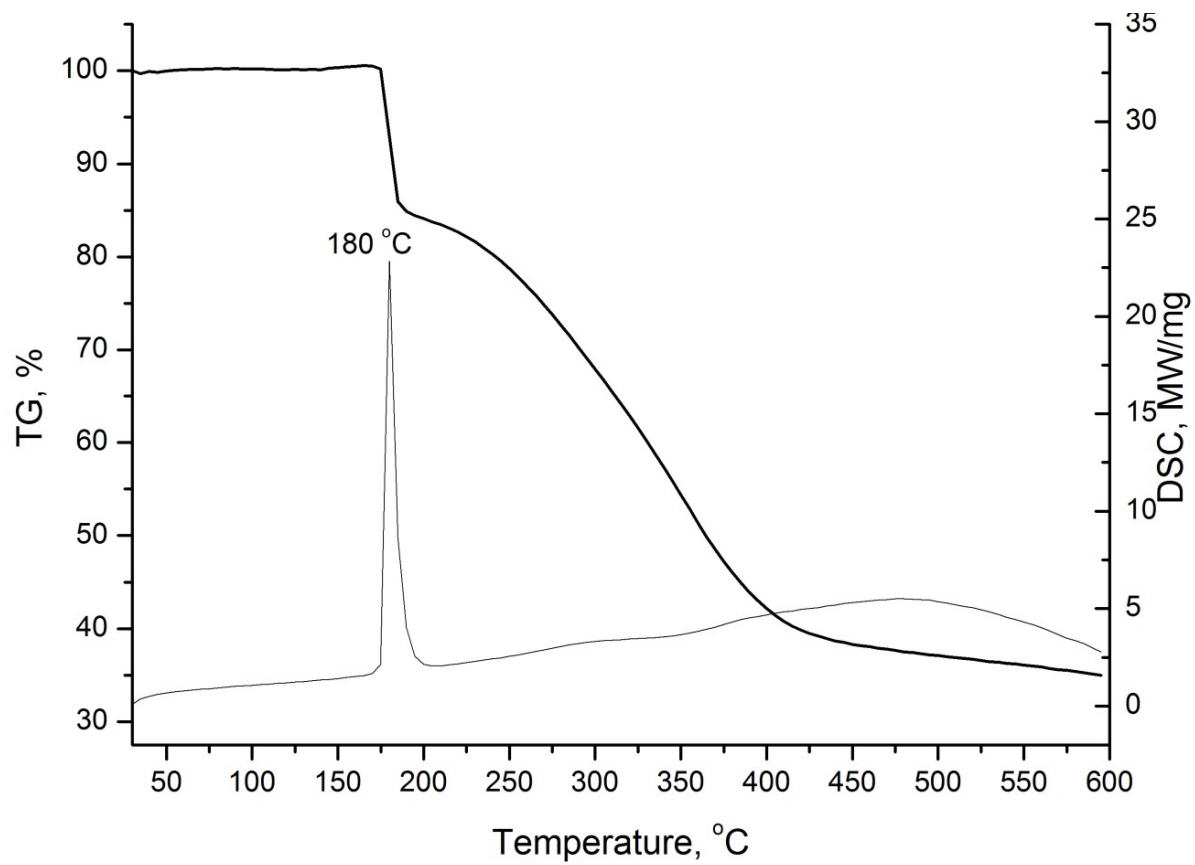

**Figure S3.** TG/DSC curves of complex  $\text{Cu}(\text{HL})_2\text{Cl}_2$  (**6**).

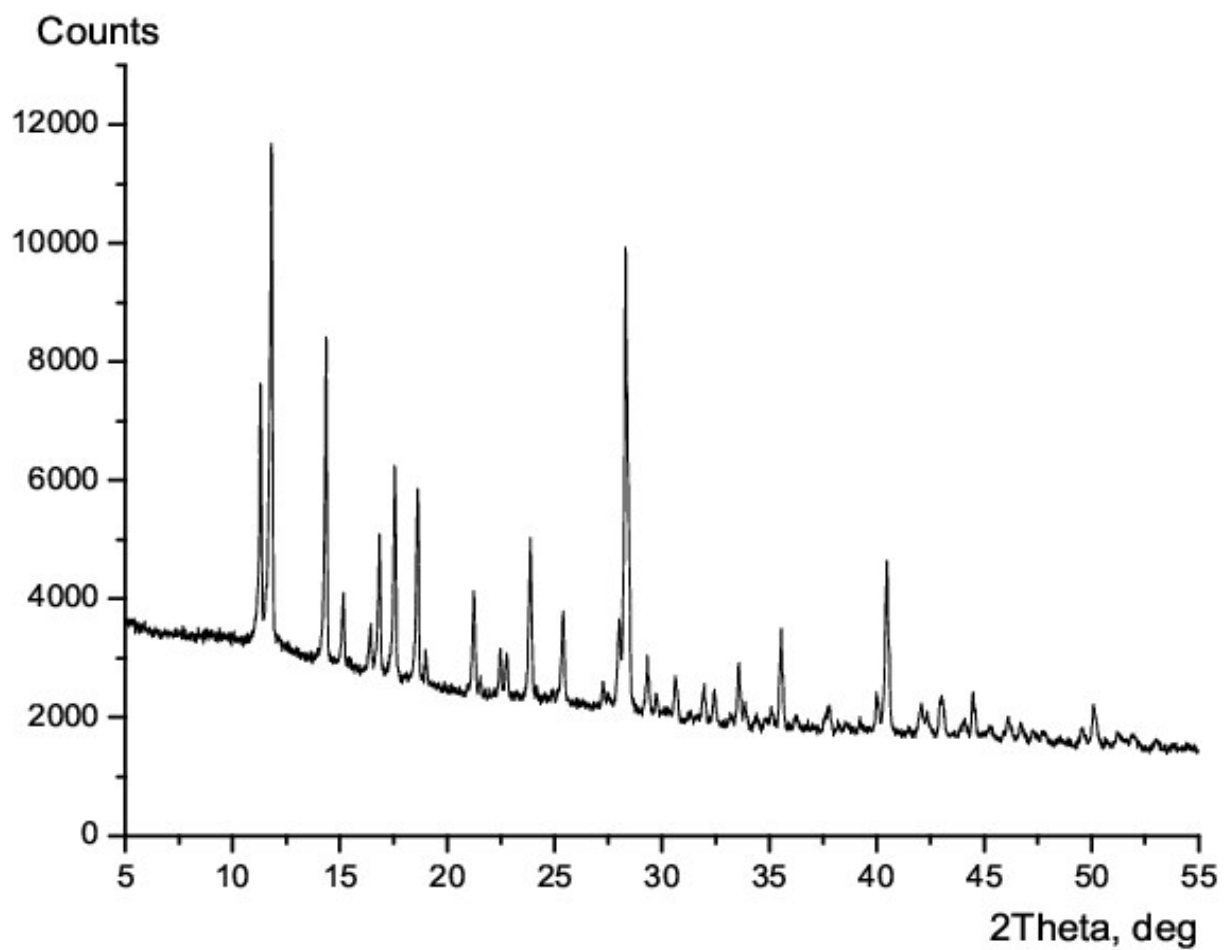

**Figure S4.** Powder diffraction pattern of complex  $\text{Cu}_2\text{L}_2\text{Cl}_2$  (**5**) at room temperature (CuK $\alpha$  radiation).

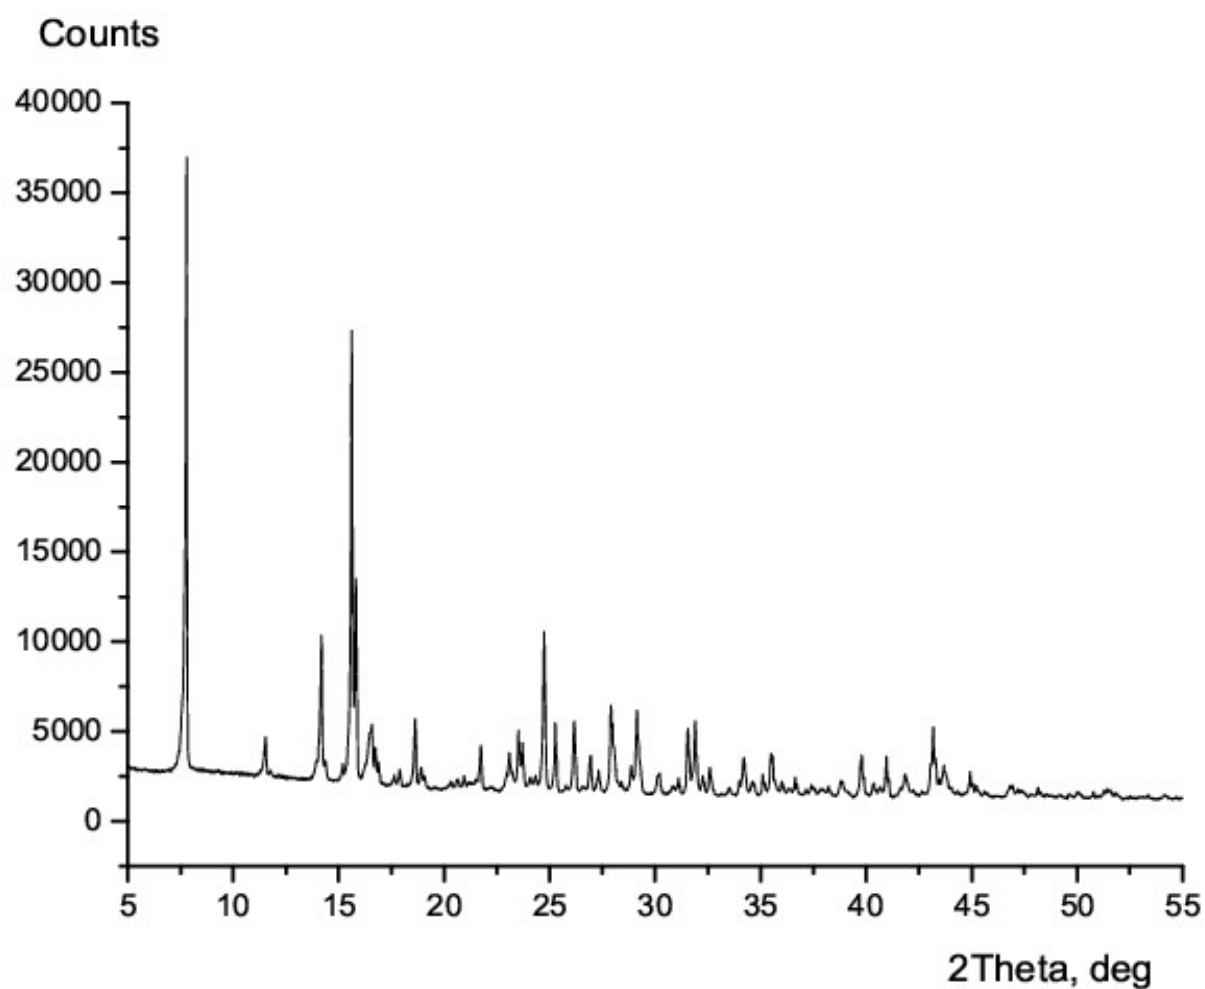

**Figure S5.** Powder diffraction pattern of complex  $\text{Cu}(\text{HL})_2\text{Cl}_2$  (**6**) at room temperature (CuK $\alpha$  radiation).

**Table S1.** Single crystal X-ray data and structure refinement details for complexes **5**, **6**<sup>a</sup> at room temperature.

|                                              | <b>5</b>                                                                        | <b>6</b>                                                          |
|----------------------------------------------|---------------------------------------------------------------------------------|-------------------------------------------------------------------|
| Formula                                      | C <sub>10</sub> H <sub>22</sub> Cl <sub>2</sub> Cu <sub>2</sub> N <sub>12</sub> | C <sub>10</sub> H <sub>24</sub> Cl <sub>2</sub> CuN <sub>12</sub> |
| Formula weight                               | 508.37                                                                          | 446.85                                                            |
| Temperature/K                                | 296(2)                                                                          | 296(2)                                                            |
| Wavelength/Å                                 | 0.71073                                                                         | 0.71073                                                           |
| Crystal system                               | Monoclinic                                                                      | Monoclinic                                                        |
| Space group                                  | <i>P</i> 2 <sub>1</sub> / <i>c</i>                                              | <i>C</i> 2/ <i>c</i>                                              |
| <i>a</i> /Å                                  | 7.6575(2)                                                                       | 23.4624(4)                                                        |
| <i>b</i> /Å                                  | 10.0729(3)                                                                      | 10.4593(2)                                                        |
| <i>c</i> /Å                                  | 12.6180(3)                                                                      | 15.5341(2)                                                        |
| $\alpha$ /°                                  | 90                                                                              | 90                                                                |
| $\beta$ /°                                   | 103.1342(14)                                                                    | 105.3813(7)                                                       |
| $\gamma$ /°                                  | 90                                                                              | 90                                                                |
| <i>V</i> /Å <sup>3</sup>                     | 947.81(4)                                                                       | 3675.53(11)                                                       |
| <i>Z</i>                                     | 2                                                                               | 8                                                                 |
| Density <sub>calc</sub> /g cm <sup>-3</sup>  | 1.781                                                                           | 1.615                                                             |
| Absorption coefficient/mm <sup>-1</sup>      | 2.549                                                                           | 1.502                                                             |
| Crystal size/mm                              | 0.31×0.14×0.11                                                                  | 0.53×0.39×0.05                                                    |
| Reflections collected                        | 9864                                                                            | 24979                                                             |
| Independent reflections                      | 2916                                                                            | 5390                                                              |
| Restraints                                   | 0                                                                               | 0                                                                 |
| Parameters                                   | 127                                                                             | 244                                                               |
| Goodness-of-fit on <i>F</i> <sup>2</sup>     | 1.009                                                                           | 1.032                                                             |
| R1/ <i>w</i> R2 [ <i>I</i> > 2σ( <i>I</i> )] | 0.0313/0.0811                                                                   | 0.0256/0.0633                                                     |
| R1/ <i>w</i> R2 [all data]                   | 0.0420/0.0874                                                                   | 0.0352/0.0679                                                     |

<sup>a</sup>*V* = volume of the unit cell; *Z* = number of formula units in unit cell; R1 and *w*R2 are discrepancy factors
